# Supplementary material
Source: Springer Nature journal article supplement (https://www.springermedizin.de/resource/supplementary/13023_2013_743_MOESM2_ESM.pdf/9642982)

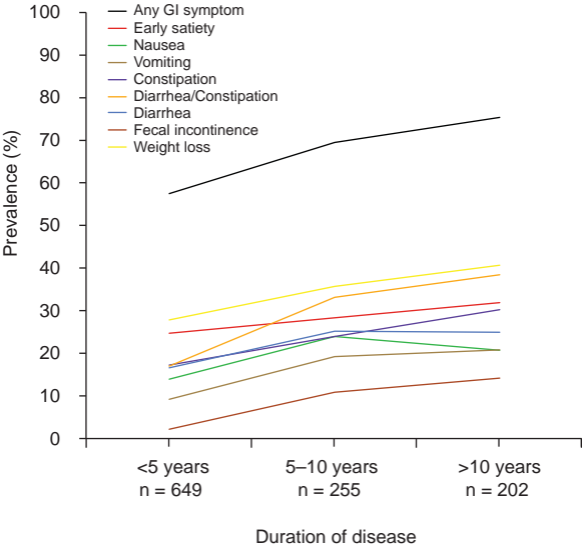

Supplement: MOESM2 [file 9642982]
